# Supplementary material
Source: publisher site journal article supplement (https://www.spandidos-publications.com/7430/downloadSupplementary)

Figure S1. Long-term effects of different dosages of fenofibrate on rat EAM. (A) Representative whole heart images (scale bar, 2 mm). (B) Representative hematoxylin and eosin staining of ventricular sections images (scale bar, 20  $\mu$ m). (C) Ratio of heart HW/BW. (D) The relative transcript levels of heart failure marker ANP were examined by reverse transcription-quantitative PCR analysis, with GAPDH serving as the internal reference for normalization. Echocardiograph parameters: (E) LVEDd (mm); (F) EF (%). The immunized EAM rats underwent daily oral gavage administration with fenofibrate (100 and 200 mg/kg) or a solvent from day 0 to day 21. All the experiment rats were euthanized on day 21. n=5 for each group. \*\*P<0.01 and \*\*\*P<0.001 vs. control. #P<0.05 and ##P<0.01 vs. EAM. ANP, Atrial natriuretic peptide; LVEDd, left ventricular end-diastolic internal diameter; EF, left ventricular ejection fraction; EAM, experimental autoimmune myocarditis; HW/BW, heart weight/body weight.

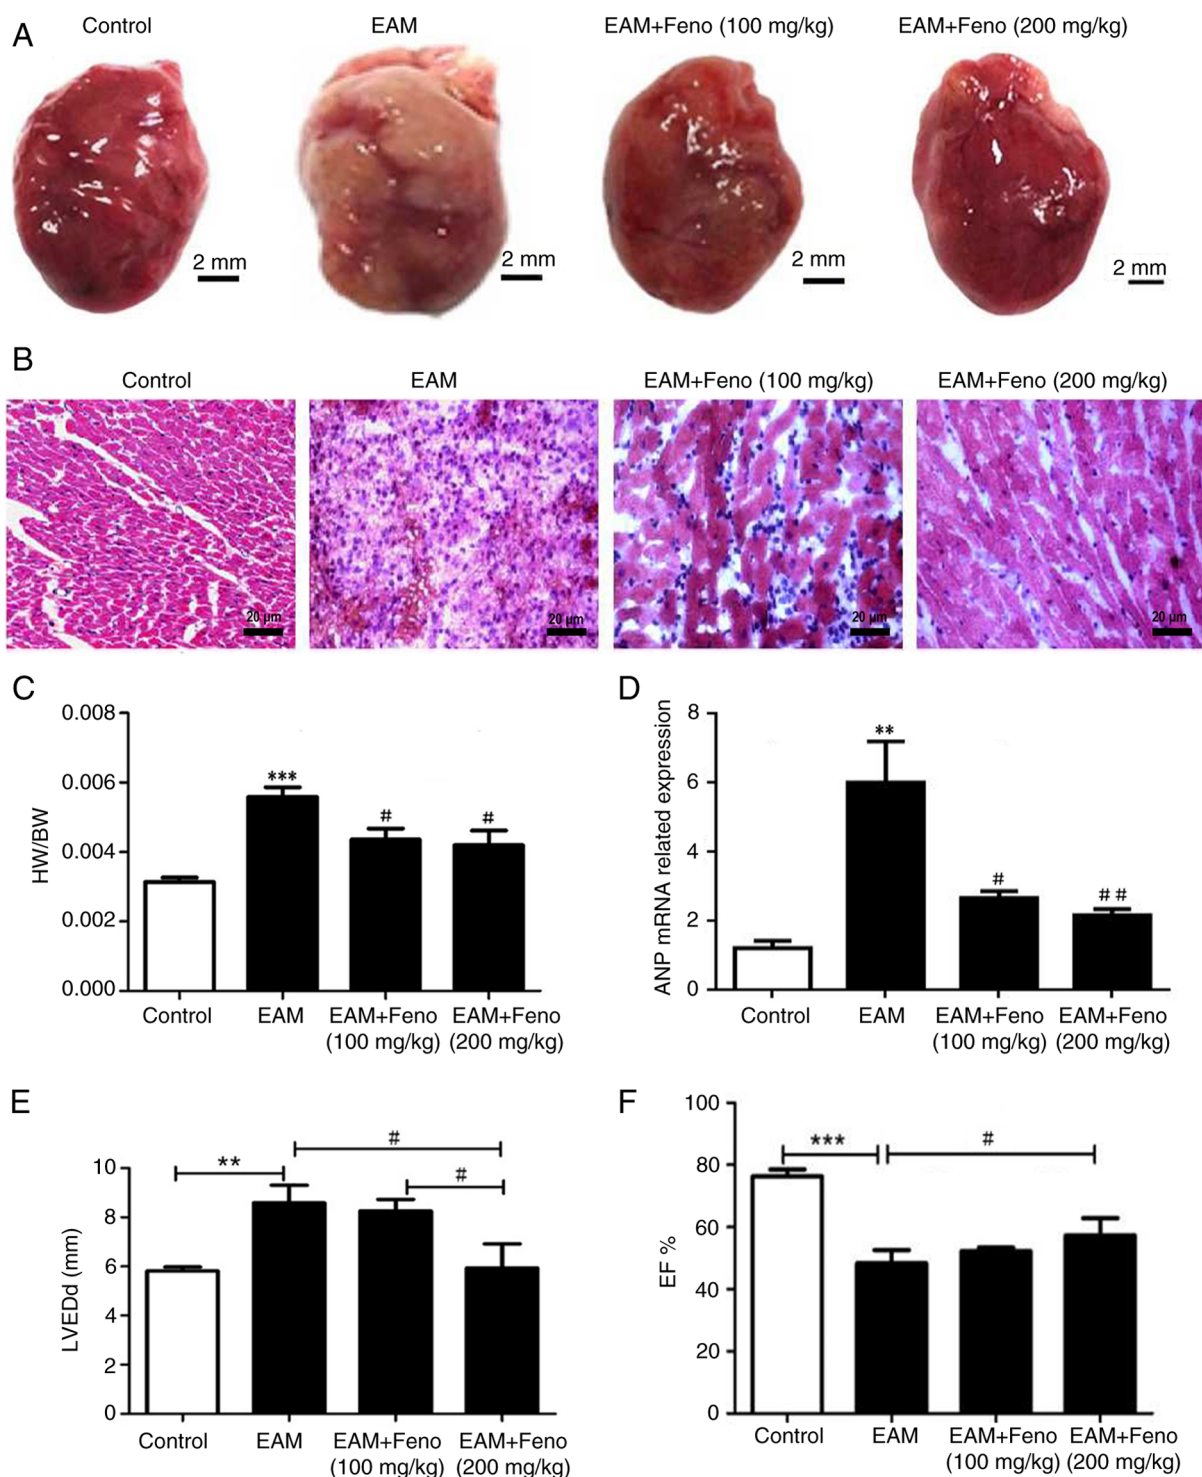

Supplement: Supplementary file 1 [file downloadSupplementary]
